# Supplementary material
Source: PubMed Central journal article supplement (PMC10247448)
Supplement: NIHMS1894362-supplement-Nemtsova_Suppl_Material.pdf [file NIHMS1894362-supplement-Nemtsova_Suppl_Material.pdf]

## Supplementary figures

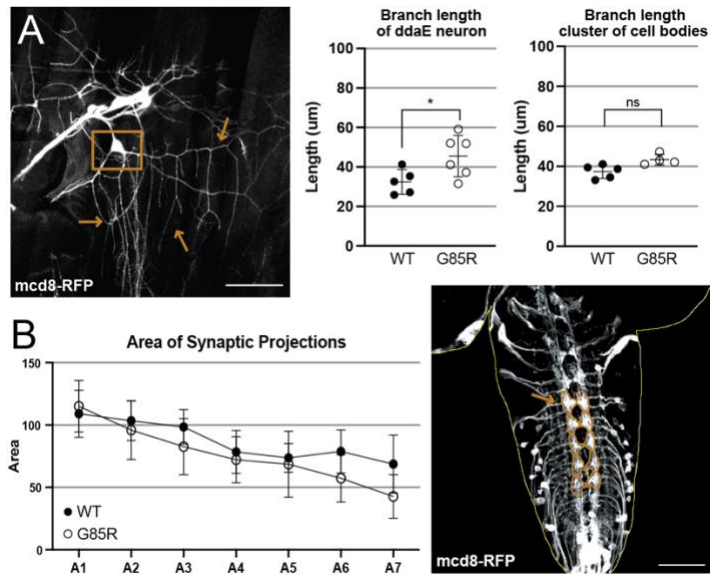

**Supp 1:** Area of ddaE dendrites is increased in  $dSod1^{G85R}$  with no change in VNC synaptic areas. **(A)** dendritic arborization in  $MD>mcd8RFP$  neurons, 20X mag. Unpaired t-test show a significant increase in dendritic branch length of the ddaE neuron in  $dSod1^{G85R}$  compared to WT. **(B)** ventral nerve cord (VNC) of  $MD>mcd8RFP$  neurons, 20X mag. Areas of  $dSod1^{G85R}$  synaptic regions are not significantly different from WT. Scale bar = 50um, student's t-test; (\*) p-value <0.05.

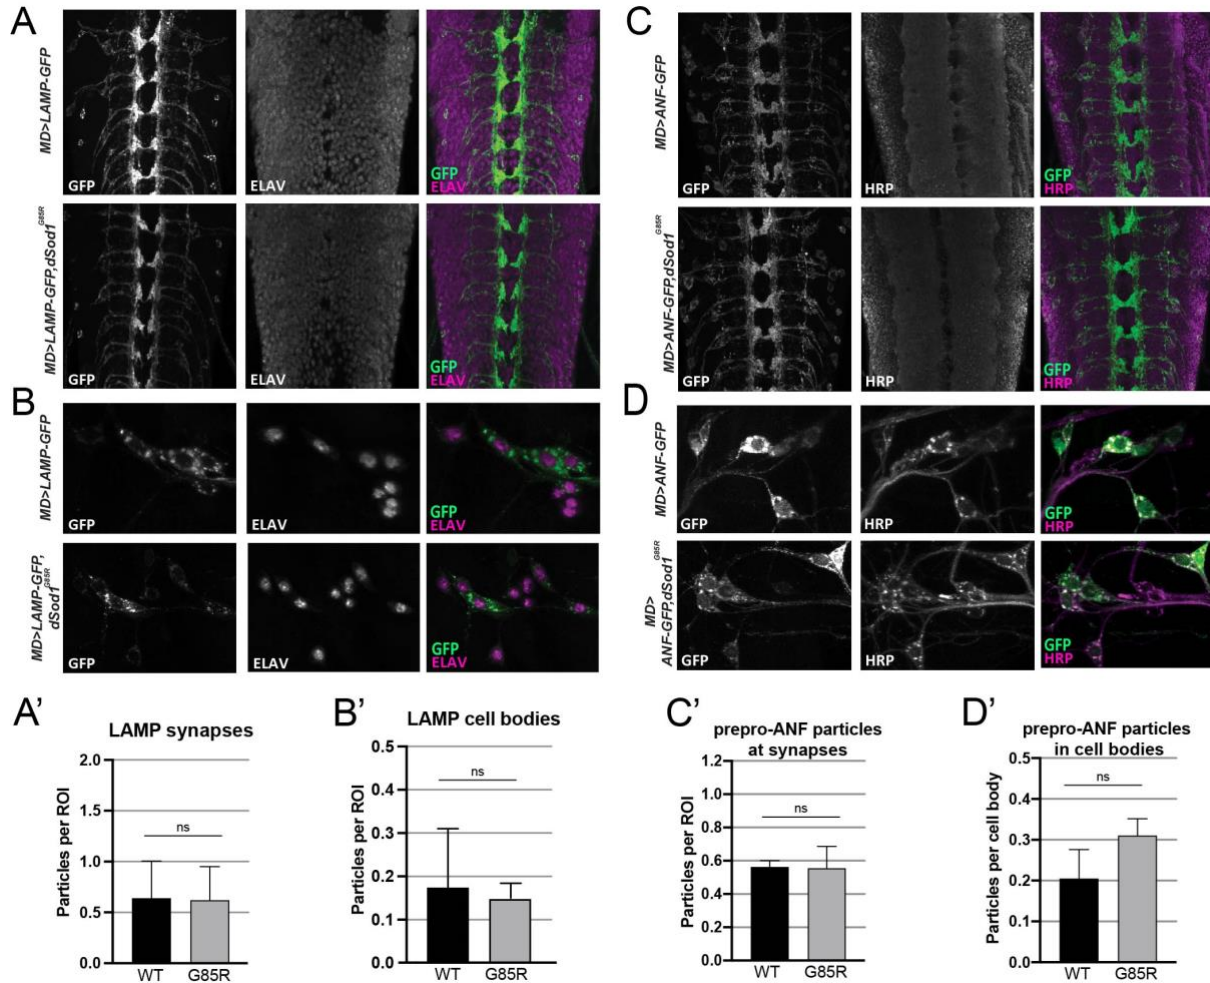

**Supp 2: (A,B)** LAMP1-GFP and **(C,D)** prepro-ANF-Emerald in fixed samples of synapses in midline of VNC (**A,C**) and cell bodies of MD neurons (**B,D**). **(A',B')** Quantification of LAMP1-GFP particles in MD synapse region of VNC and cell bodies in the periphery. **(C',D')** Quantification of prepro-ANF-Emerald particles in MD synapse region of VNC and cell bodies in the periphery. LAMP1-GFP,WT and LAMP-GFP,G85R (n=8); prepro-ANF-Emerald,WT and prepro-ANF-Emerald,G85R (n=4). **(C-F)** stained with pan-neuronal marker anti-ELAV or neuronal-membrane specific horseradish peroxidase (HRP). Quantification of fixed samples, Students' t-test; (\*) p-value <0.05. Full genotypes denoted in Table 1.

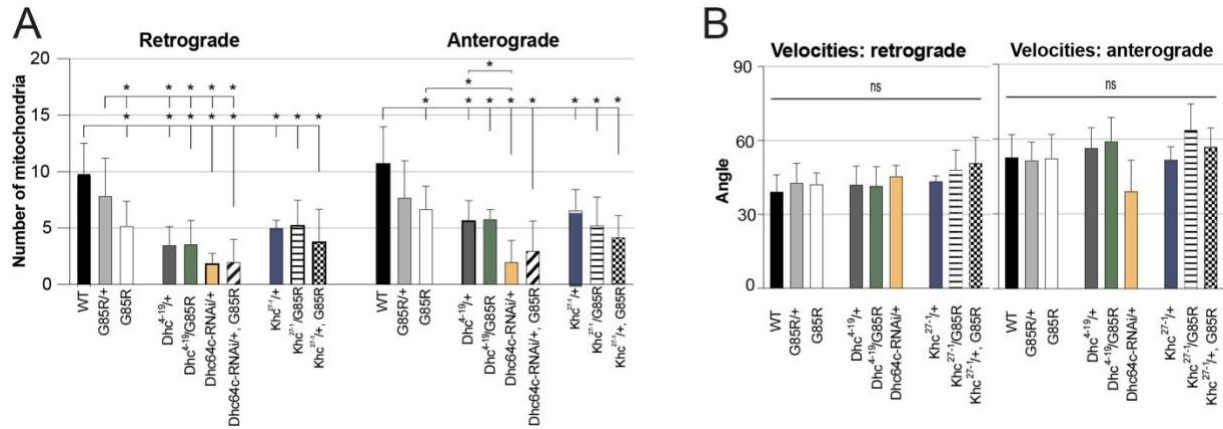

**Supp 3:** Defects in mitochondrial transport associated with loss of microtubule motors not enhanced in *dSod1<sup>G85R</sup>*. **(A)** Quantification of number of mitochondria (mito-GFP) observed by live imaging moving in a retrograde or anterograde direction along MD axon in different genotypes: WT (n=19), G85R/+ (n=7), G85R (n=20), Dhc<sup>4-19</sup>/+ (n=6), Dhc<sup>4-19</sup>/G85R (n=5), Dhc64c-RNAi/+ (n=7), Dhc64c-RNAi/+ , G85R (n=3), Khc<sup>27-1</sup>/+ (n=6), Khc<sup>4/19</sup>/G85R (n=4), Khc<sup>4/19</sup>/+ , G85R (n=5); **(B)** velocity of mito-GFP movement in retrograde and anterograde direction was quantified from kymographs. Ordinary one-way ANOVA with Tukey's multiple comparison test, (\*) p-value <0.05. Full genotypes in Table 1.

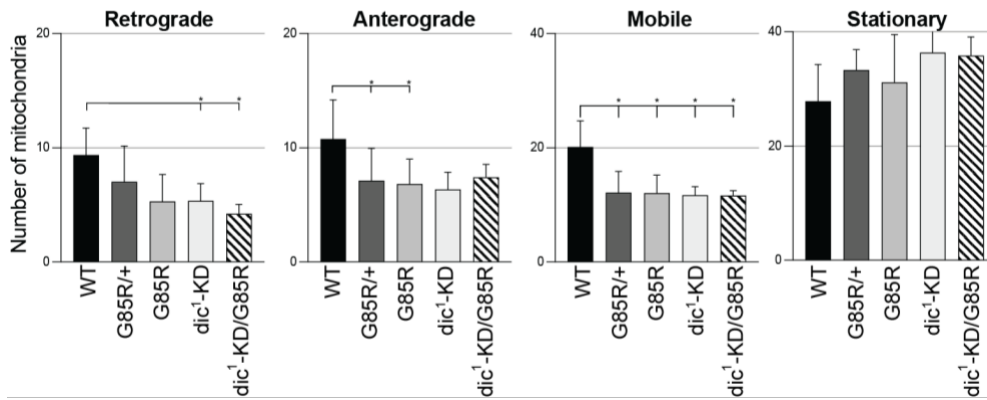

**Supp 4:** Dynein intermediate chain null allele, *dic<sup>1</sup>*, does not genetically interact with *dSod1<sup>G85R</sup>*. Retrograde, anterograde, mobile, and stationary mitochondria number, quantified from kymographs. **WT** (*w; MD-Gal4/+; UAS-mitoGFP +/+ dSod1<sup>WT</sup>*) (n=17), **G85R/+** (*w; MD-Gal4/+; + /UAS-mitoGFP dSod1<sup>G85R</sup>*) (n=10), **G85R** (*w; MD-Gal4/+; + dSod1<sup>G85R</sup>/UAS-mitoGFP dSod1<sup>G85R/+</sup>*) (n=17), **dic<sup>1</sup>-KD** (*w; MD-Gal4/+; + dic<sup>1</sup>/UAS-mitoGFP dSod1<sup>WT</sup> +*) (n=3), **dic<sup>1</sup>-KD/G85R** (*w; MD-Gal4/+; + dic<sup>1</sup>/UAS-mitoGFP dSod1<sup>G85R/+</sup>*) (n=5). Ordinary one-way ANOVA with Tukey's multiple comparison test; (\*) p-value <0.05.

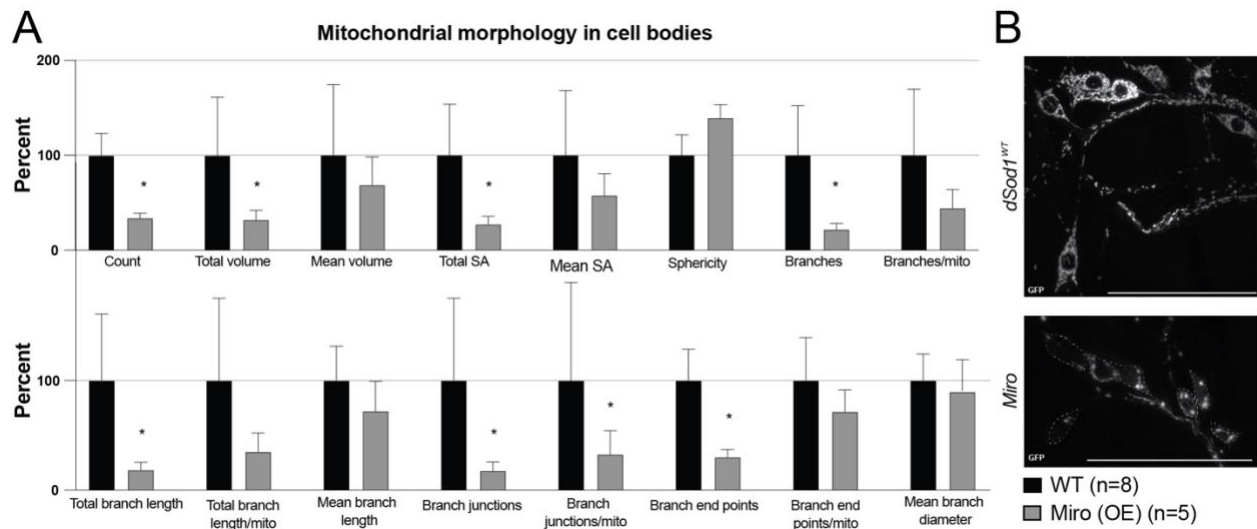

**Supp 5:** Overexpression of *Miro* alters mitochondrial morphology in MD neuron cell bodies. **(A)** Different structural parameters quantified using Mitochondria-Analyzer. **(B)** Confocal image of mito-GFP in WT (B-top) and Miro (OE) (B-bottom). *MD-Gal4/+;UAS-mito-GFP,dSod1<sup>WT/+</sup>* (or *UAS-Miro*). Scale bar is 50um, student's t-test; (\*) p-value <0.05.

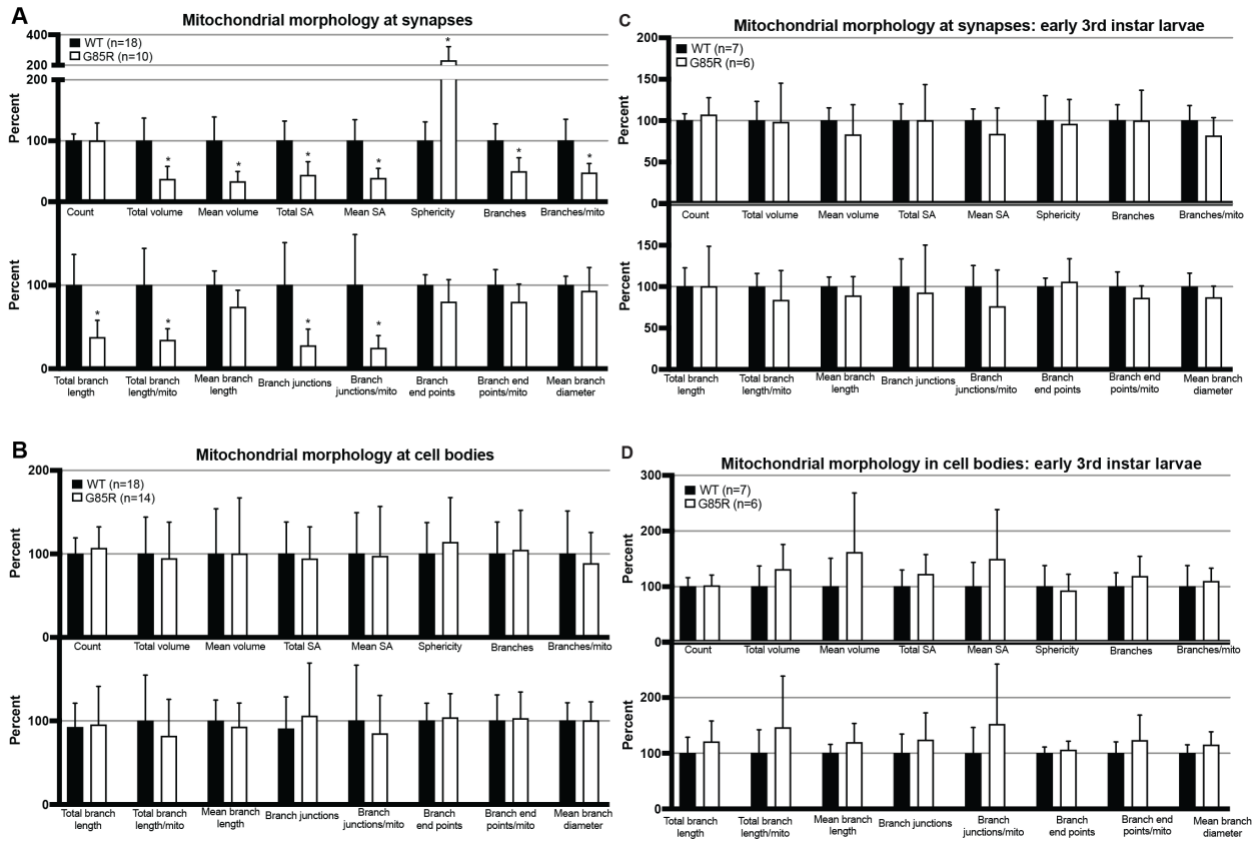

**Supp 6: Mitochondrial morphology altered in *dSod1<sup>G85R</sup>* MD synapses – full data set for Figure 3. (A,B) Quantitative assessment of mitochondrial morphology in synapses and cell bodies of WT (black bars) and G85R (white bars) wandering third instar larvae. (C,D) Quantitative assessment of mitochondrial morphology in WT vs G85R MD synapses (top) and cell bodies (bottom) in early third instar larval Student's t-test, (\*) p-value<0.05.**

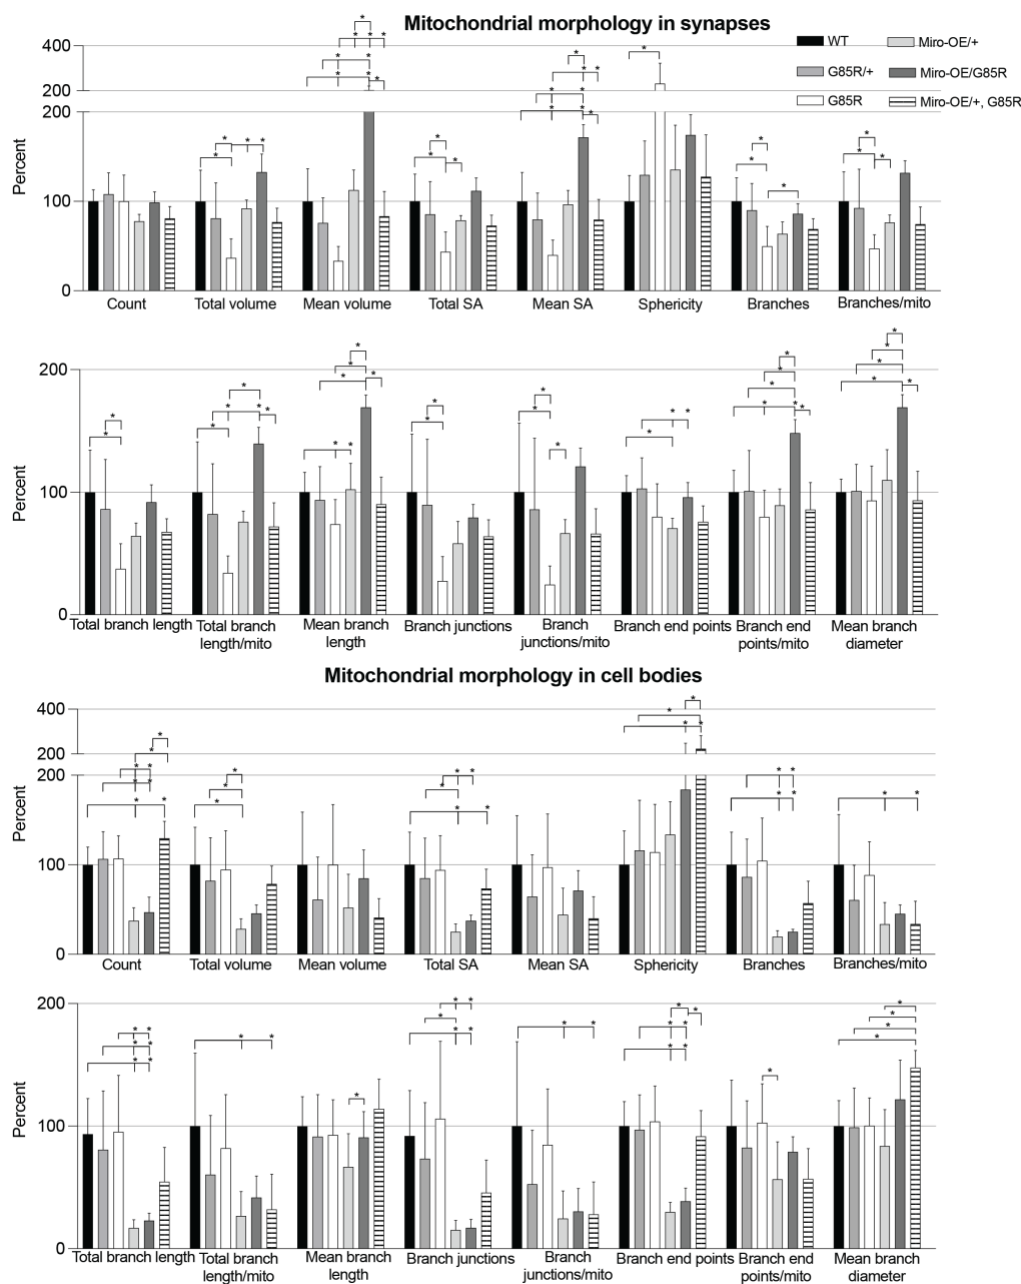

**Supp 7:** Overexpression of *Miro* (Miro-OE) rescues defects in mitochondrial morphology in MD neurons observed in *dSod1<sup>G85R</sup>* homozygotes. Modified mitochondrial morphology observed when Miro-OE in *dSod1<sup>G85R</sup>/+* heterozygotes indicates a genetic interaction. Full dataset for Figure 5. Quantifications of different morphological parameters in synapses (top two panels) and in cell bodies (bottom two panels). WT (n=21), G85R/+ (n=15), G85R (n=8), Miro-OE (n=7), Miro-OE/G85R (n=4), Miro-OE/+, G85R (n=6), see Table 1 for full genotypes. Ordinary one-way ANOVA with Tukey's multiple comparison test; (\*) p-value <0.05.

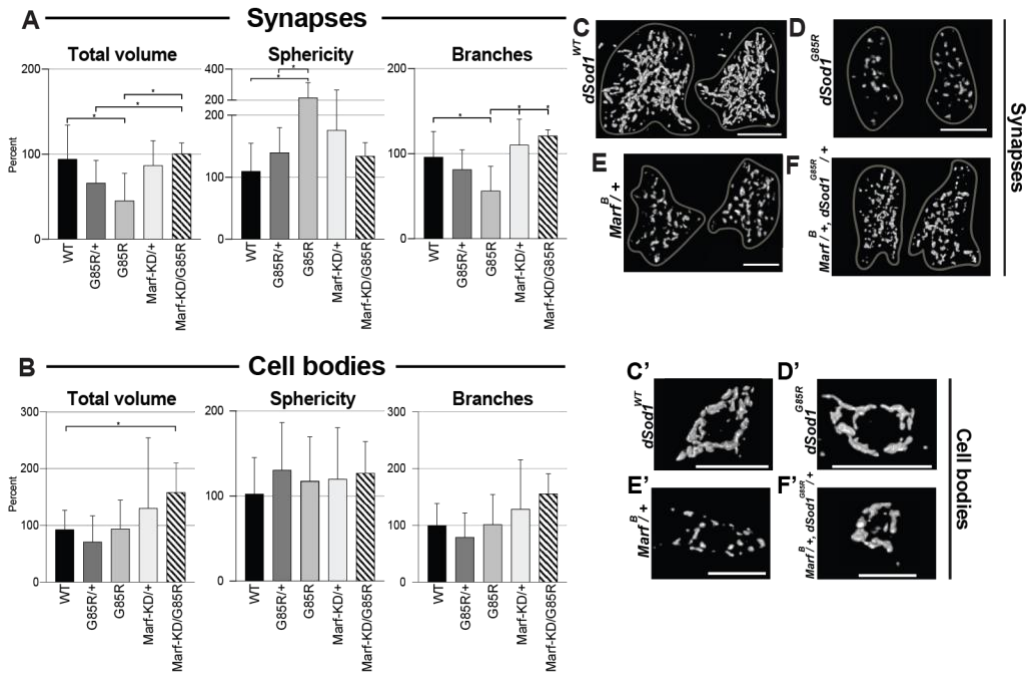

**Supp 8:** *Marf* knockdown does not rescue mitochondrial morphology defects in *dSod1*<sup>G85R</sup> MD neurons. Quantifications of mitochondrial total volume, sphericity, and branches in MD neurons of *dSod1*<sup>G85R</sup> larvae in relation to the functional null fission factor *Marf*, *Marf*<sup>B</sup> (*Marf*-KD) (**A,B**). Mitochondrial morphological changes in synapses (**A**) of WT (n=20), G85R/+ (n=16), G85R (n=17), *Marf*-KD/+ (n=3), and *Marf*-KD/G85R (n=3) 3<sup>rd</sup> instar larva, and cell bodies (**B**) of WT (n=20), G85R/+ (n=15), G85R (n=15), *Marf*-KD/+ (n=3), and *Marf*-KD/G85R (n=3) (Table 1 for full genotypes) 3<sup>rd</sup> instar larva. (**C-F**) 3D reconstruction of synaptic mitochondria at segments A2 of the VNC, left and right side, (**C'-F'**) 3D reconstruction of mitochondrial at cell bodies of *ddaE* cell in the *da* cluster. Ordinary one-way ANOVA with Tukey's multiple comparison test; (\*) p-value <0.05. All data from Mitochondrial Analyzer plugin in Supp 7.



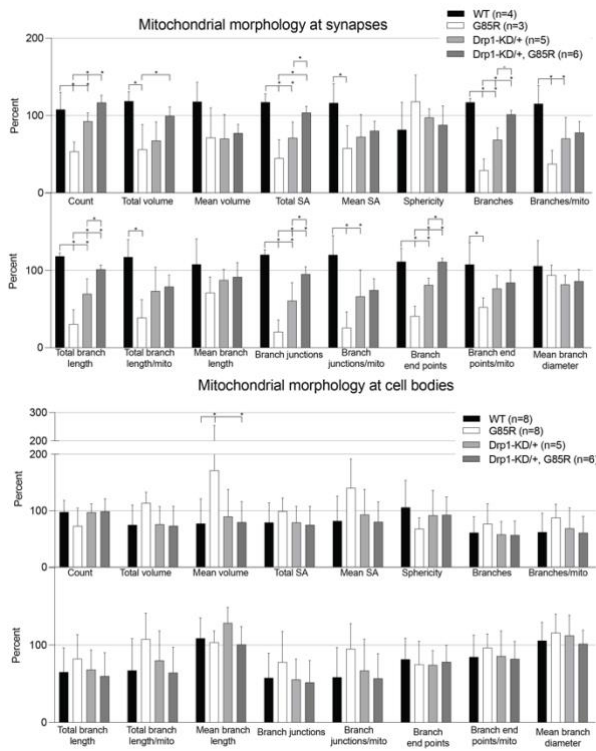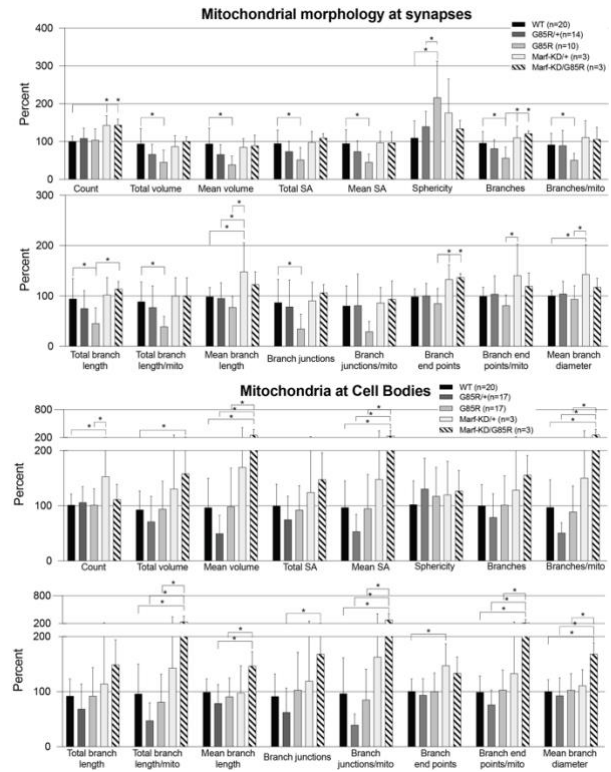

**Supp 9:** *Drp1* knockdown rescues mitochondrial morphology defects in *dSod1<sup>G85R</sup>* MD axons, while *Marf* knockdown does not - full data sets for Figure 6, showing mitochondrial morphology outputs with manipulations of *Drp1*-KD and *Marf*-KD in MD neurons. Statistical analysis: one-way ANOVA with Tukey's multiple comparison test on normally distributed data, Kruskal-Wallis test with a Dunn correction for multiple comparisons on non-normally distributed data, (\*) p-value <0.05.

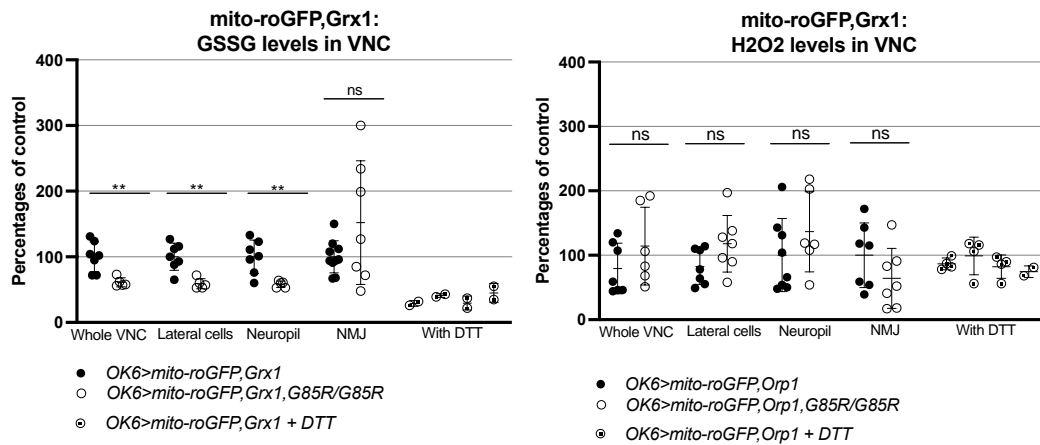

**Supp 10:** Decreased levels of mitochondrial glutathione redox couple in VNCs of *dSod1<sup>G85R</sup>* motor neurons. Quantification of redox couples in *OK6-Gal4* motor neuron driver in whole VNC, lateral cells of the VNC, neuropil of the VNC, and the NMJ. VNCs treated with DTT reductant used as a positive control shows effectiveness of biosensor. Students' t-test, (\*) p-value <0.05.

**A**

**Mitochondrial morphology at synapses**

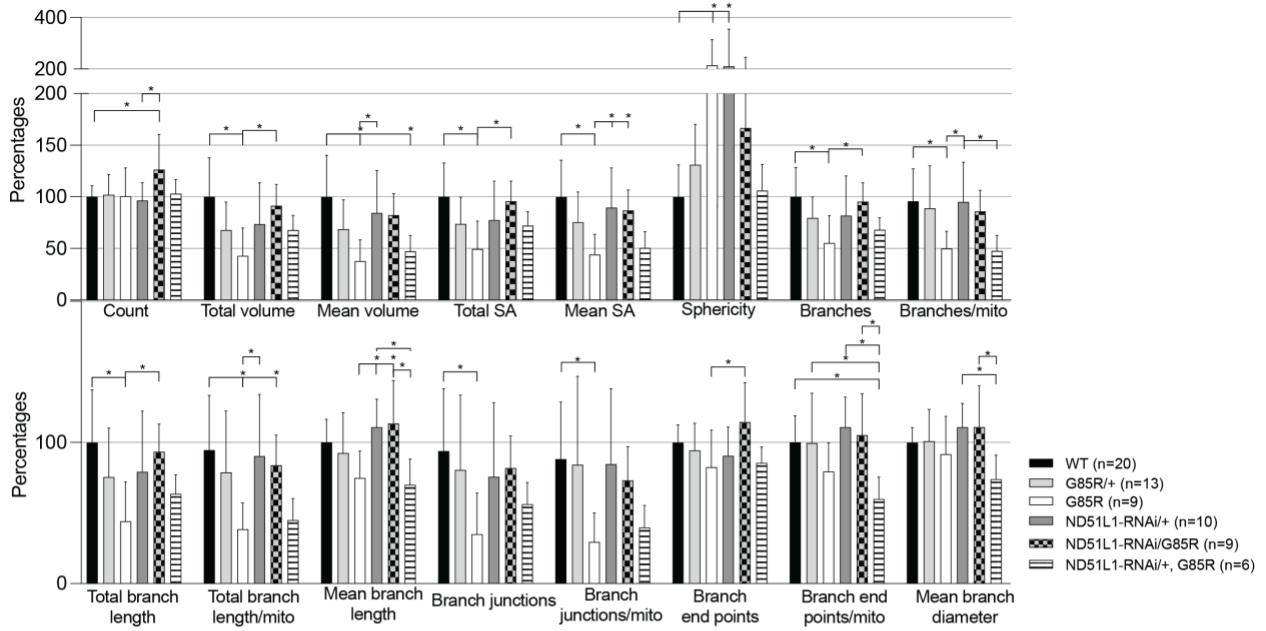

**Mitochondrial morphology at cell bodies**

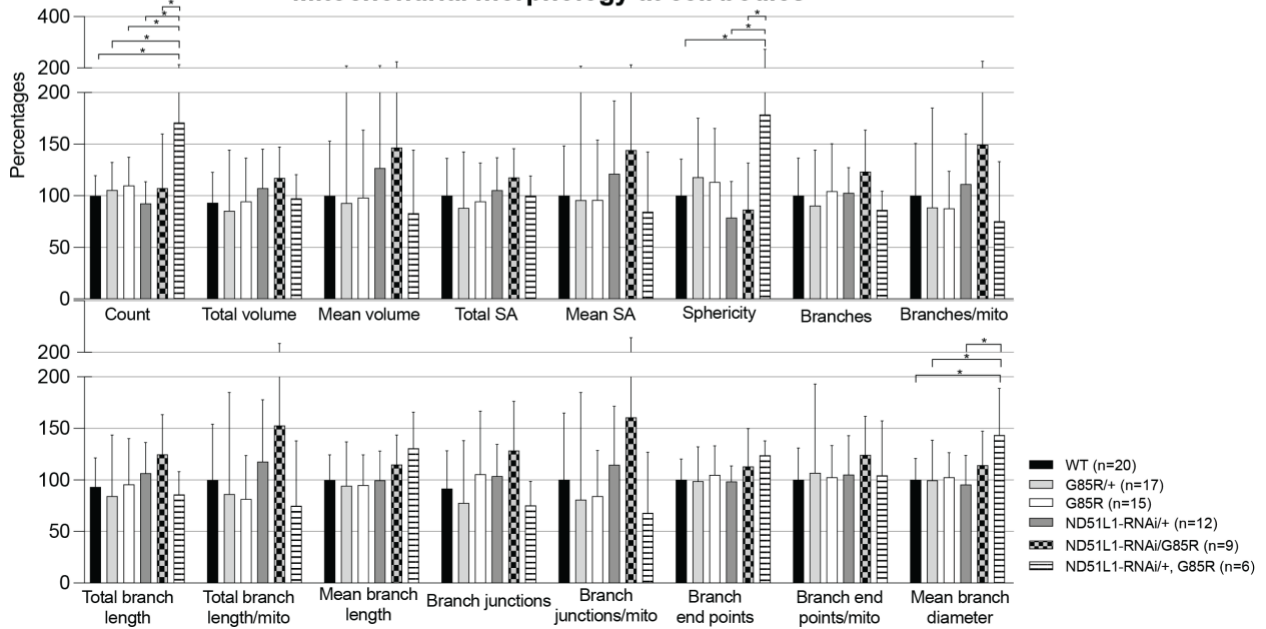

Supp 11A. Full legend below.

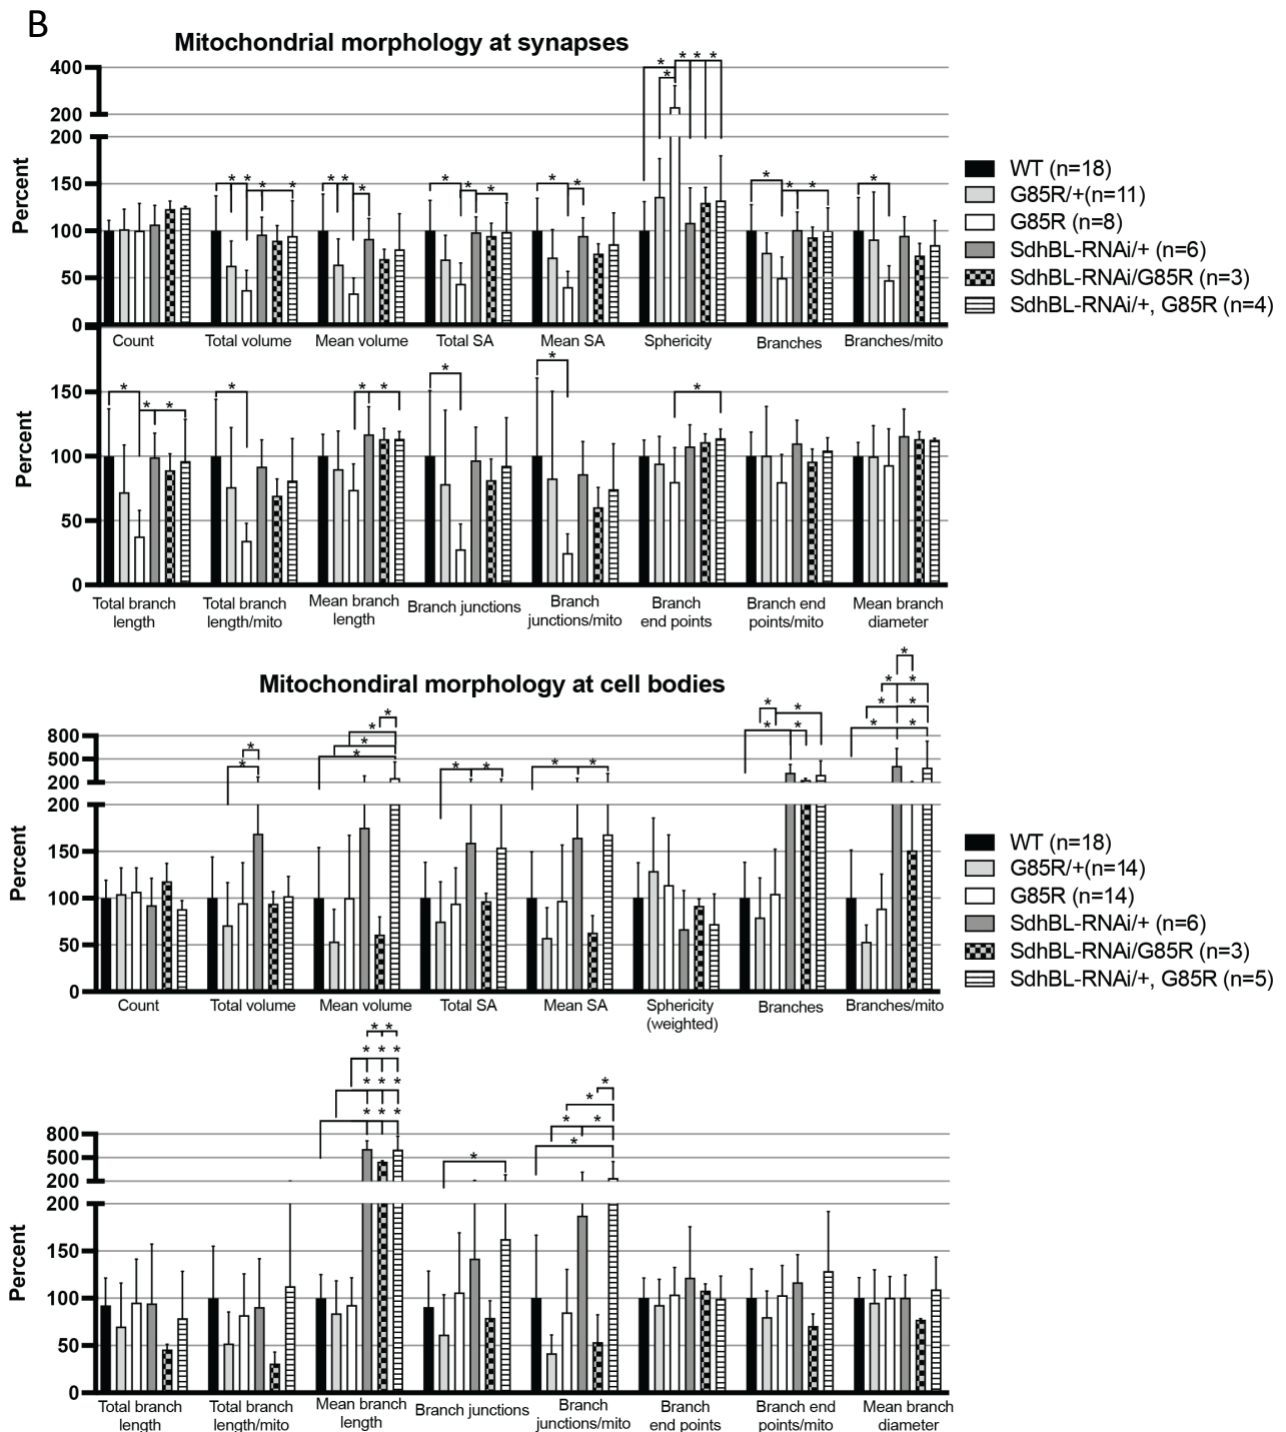

Supp 11B. Full legend below.

C

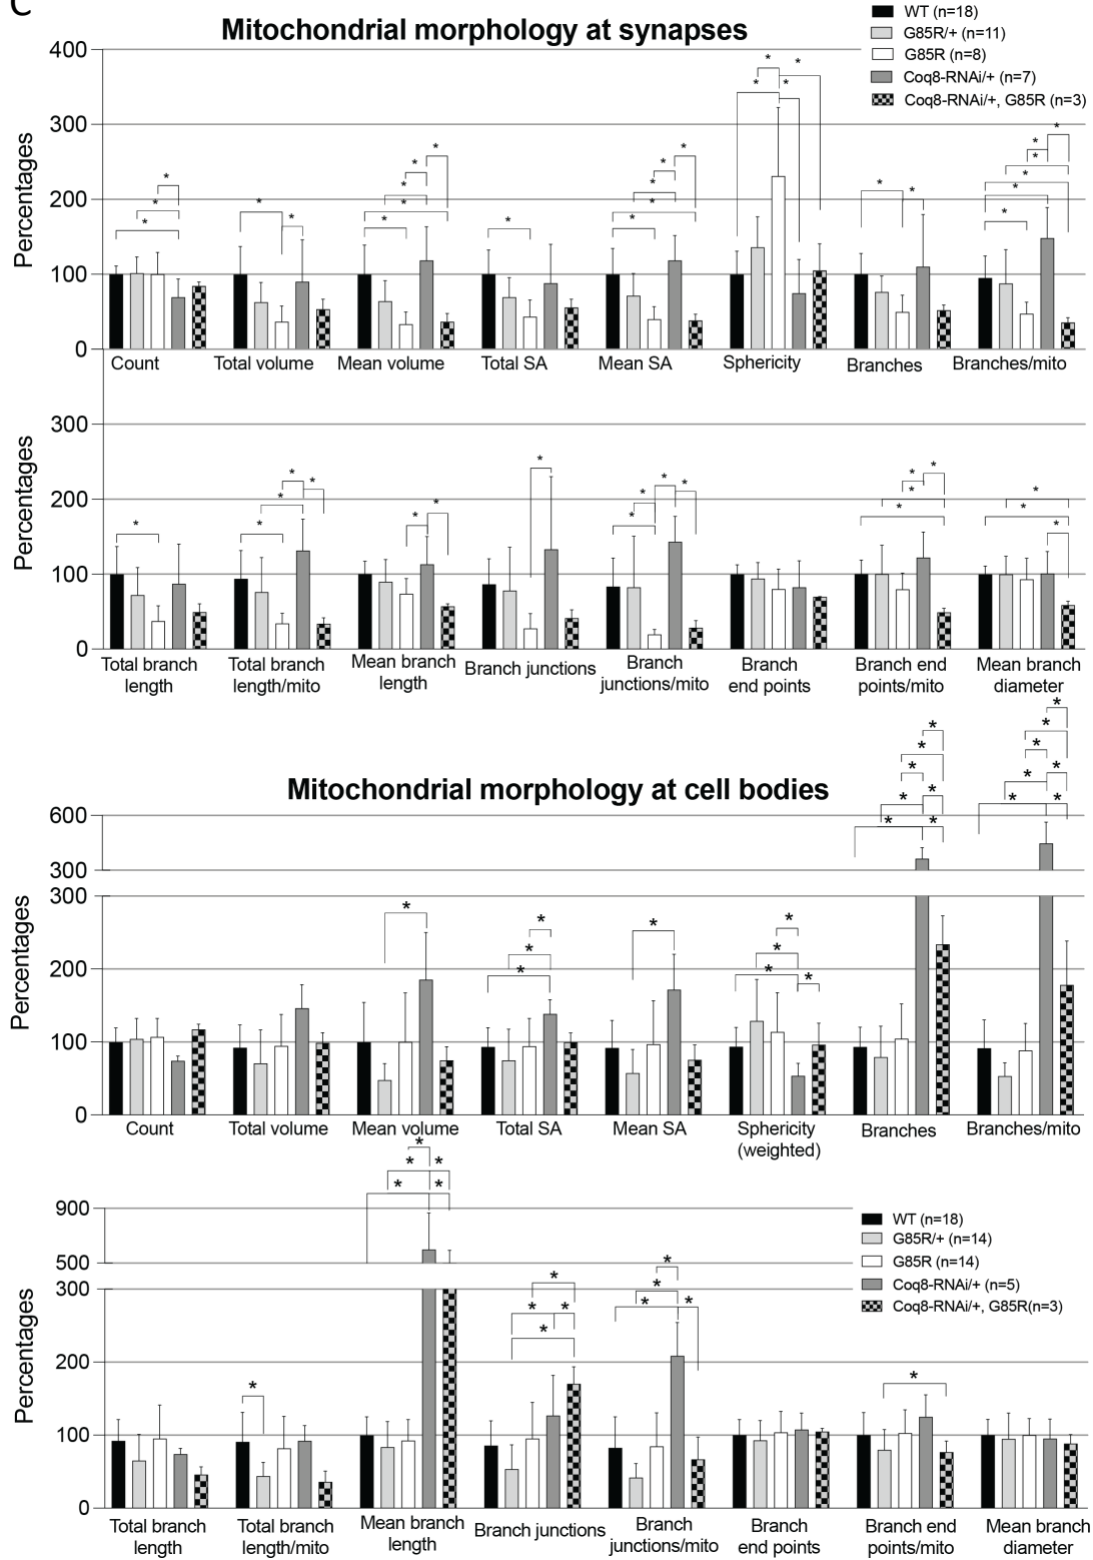

Supp 11C. Full legend below.

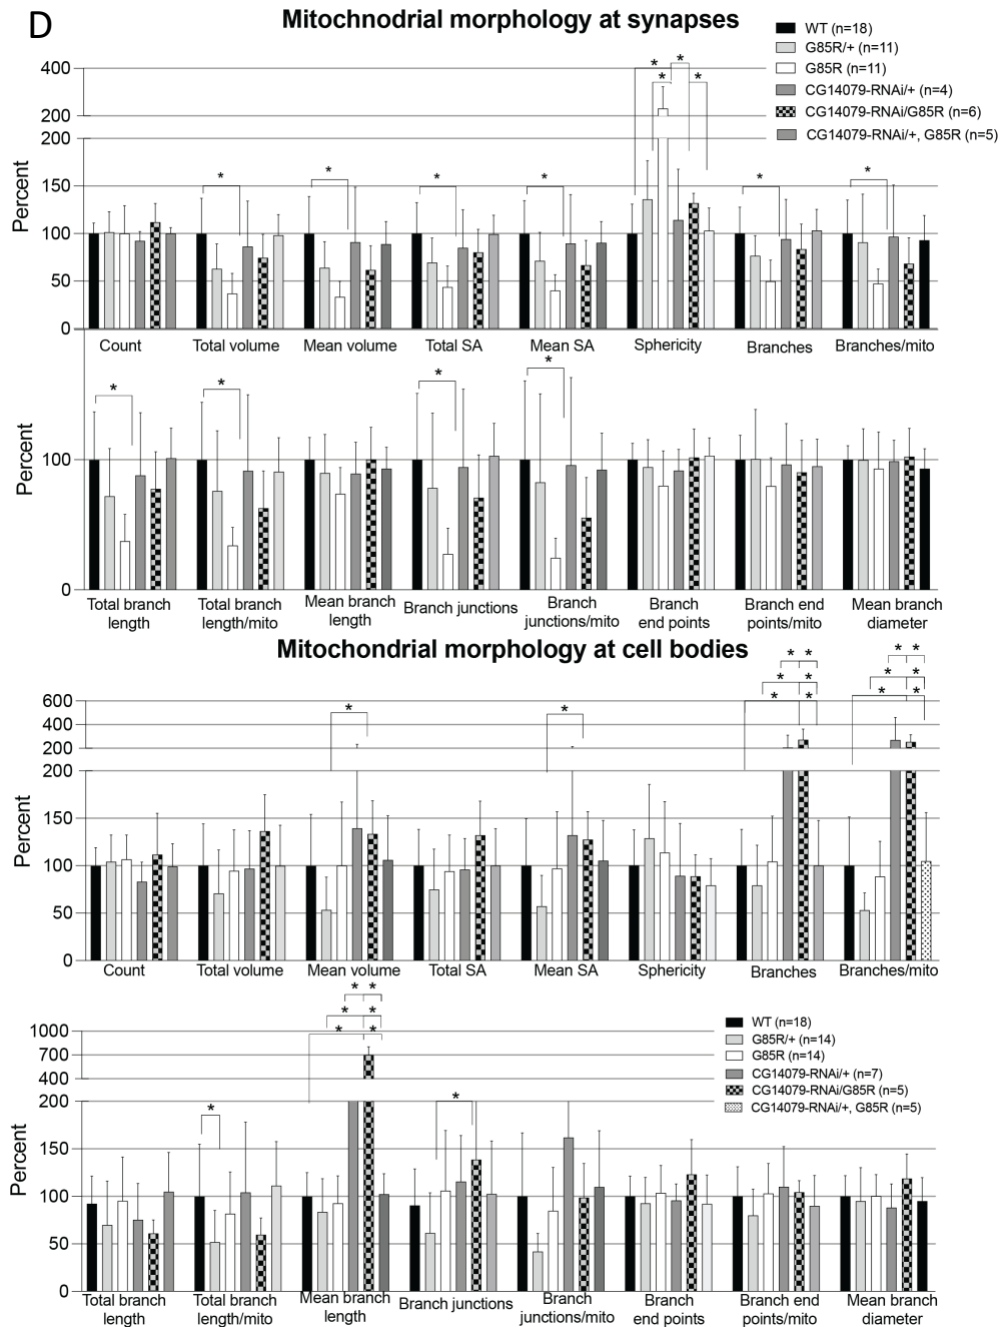

**Supp 11:** Knockdown of complex I, II, and IV subunits ameliorates mitochondrial morphological defects in *dSod1<sup>G85R</sup>* MD neurons - full data sets for Figure 9, showing mitochondrial morphology outputs with manipulations of (A) ND51L1-RNAi, (B) SdhBL-RNAi, (C) Coq8-RNAi, and (D) CG14077-RNAi in MD synapses (top) and cell bodies (bottom). Table 1 for full genotypes. One-way ANOVA with Tukey's multiple comparison test on normally distributed data; Kruskal-Wallis test with a Dunn correction for multiple comparisons on non-normally distributed data, (\*) p-value < 0.05.

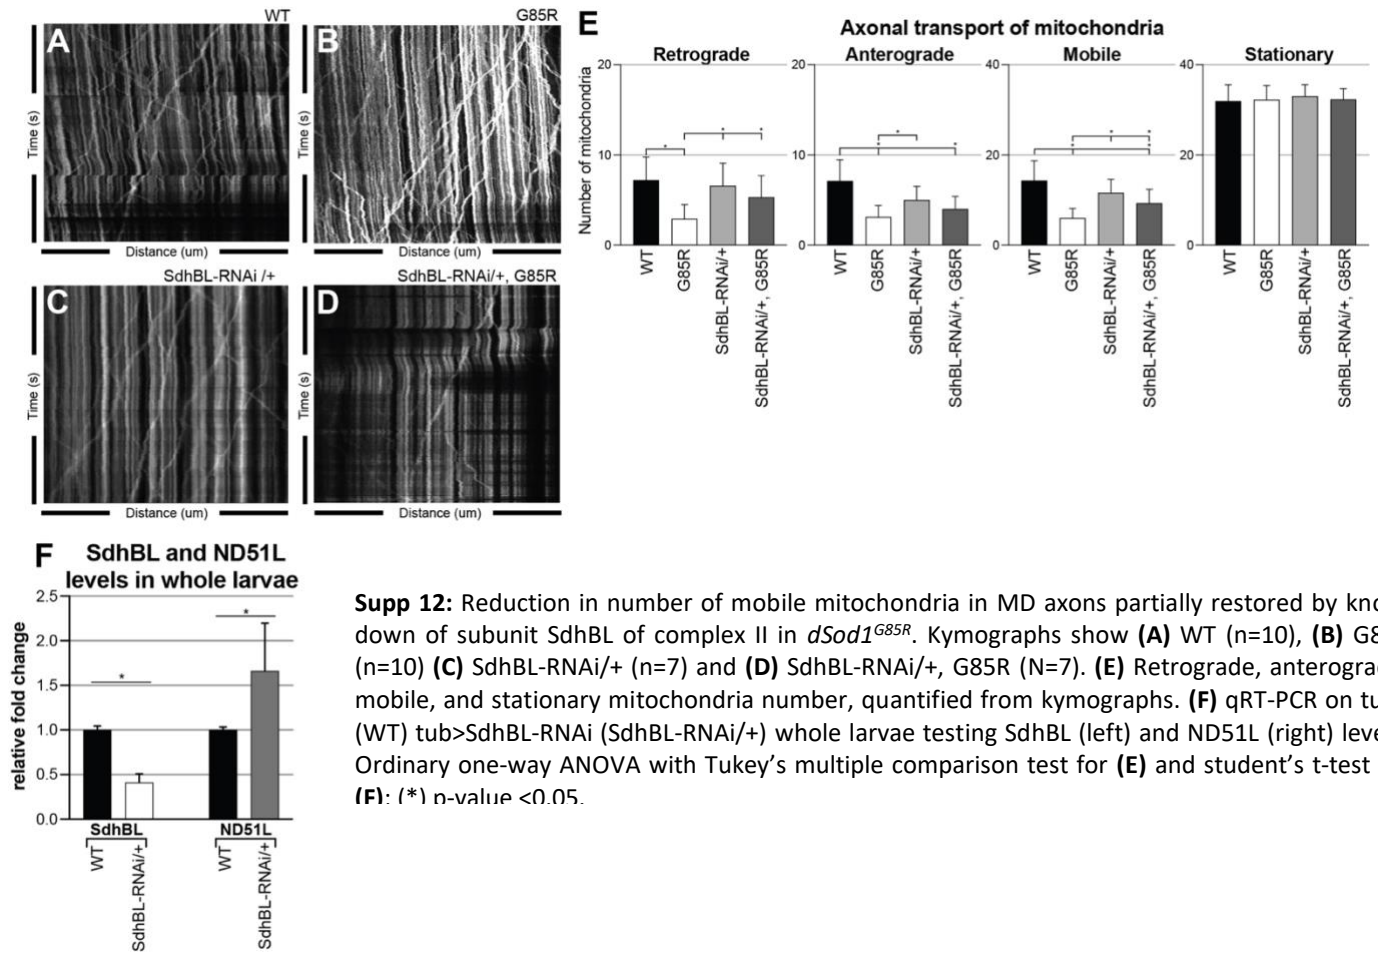

**Supp 12:** Reduction in number of mobile mitochondria in MD axons partially restored by knock down of subunit SdhBL of complex II in *dSod1<sup>G85R</sup>*. Kymographs show (A) WT (n=10), (B) G85R (n=10) (C) SdhBL-RNAi/+ (n=7) and (D) SdhBL-RNAi/+, G85R (N=7). (E) Retrograde, anterograde, mobile, and stationary mitochondria number, quantified from kymographs. (F) qRT-PCR on tub> (WT) tub>SdhBL-RNAi (SdhBL-RNAi/+) whole larvae testing SdhBL (left) and ND51L (right) levels. Ordinary one-way ANOVA with Tukey's multiple comparison test for (E) and student's t-test for (F): (\*) n-value <0.05.
